# Supplementary material for: Discovery of a New Drug-like Series of OGT Inhibitors by Virtual Screening
Source: MDPI journal article supplement (doi:10.3390/molecules27061996), 2022-03-19

# Discovery of a New Drug-Like Series of OGT Inhibitors by Virtual Screening.

Elena M. Loi<sup>1,2</sup>, Tihomir Tomašič<sup>1</sup>, Cyril Balsollier<sup>2,1</sup>, Kevin van Eekelen<sup>2</sup>, Matjaž Weiss<sup>1</sup>, Martina Gobec<sup>1</sup>, Matthew G. Alteen<sup>3</sup>, David J. Vocadlo<sup>3</sup>, Roland J. Pieters<sup>2</sup>, Marko Anderluh<sup>1</sup>

<sup>1</sup>*Department of Pharmaceutical Chemistry, Faculty of Pharmacy, University of Ljubljana, Ljubljana, 1000, Slovenia*

<sup>2</sup>*Department of Chemical Biology & Drug Discovery, Utrecht Institute for Pharmaceutical Sciences, Utrecht University, 3584 CG Utrecht, The Netherlands*

<sup>3</sup>*Department of Chemistry, Simon Fraser University, Burnaby, BC, V5A 1S6, Canada*

## Supplementary information

**Table S1.** List of most potent OGT inhibitors reported to date and their properties.

| Name                                                               | Structure                                                                           | Inhibitory parameter                  | Issue                                                           | Reference                                                               |
|--------------------------------------------------------------------|-------------------------------------------------------------------------------------|---------------------------------------|-----------------------------------------------------------------|-------------------------------------------------------------------------|
| <b>Substrate analogues</b>                                         |                                                                                     |                                       |                                                                 |                                                                         |
| <b>Ac<sub>4</sub>-5S-GlcNAc</b>                                    | 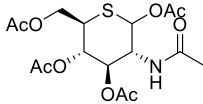 | EC <sub>50</sub> = 5 μM               | Cell permeable<br>Off-target effects<br>Poor aqueous solubility | Dorfmueller, H. C. et al. <i>Amino Acids</i> 40, 781–792 (2011).        |
| <b>5S-GlcNHex</b>                                                  |  | Similar to Ac <sub>4</sub> -5S-GlcNAc | Cell permeable<br>Off-target effects                            | Liu, T. W. et al. <i>Angew. Chemie - Int. Ed.</i> 57, 7644–7648 (2018). |
| <b>Ac<sub>4</sub>-ES1</b>                                          |  | Similar to Ac <sub>4</sub> -5S-GlcNAc | Cell permeable<br>Covalent inhibitor<br>Selective               | Worth, M. et al. <i>Chem. Commun.</i> 55, 13291–13294 (2019).           |
| <b>High-throughput and virtual screening identified inhibitors</b> |                                                                                     |                                       |                                                                 |                                                                         |
| <b>OSMI-1</b>                                                      |  | IC <sub>50</sub> = 2.7 μM             | Cell permeable<br>Off-target effects                            | Ortiz-Meoz, R. F. et al. <i>ACS Chem. Biol.</i> 10, 1392–1397 (2015).   |

|                                      |                                                                                                 |                                                                                                         |                                                                             |                                                                    |
|--------------------------------------|-------------------------------------------------------------------------------------------------|---------------------------------------------------------------------------------------------------------|-----------------------------------------------------------------------------|--------------------------------------------------------------------|
| OSMI-2<br>OSMI-3<br>OSMI-4           | 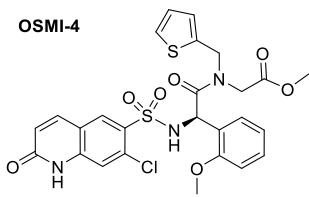 <p>OSMI-4</p> | OSMI-2 (acid form) $K_D = 140$ nM<br>OSMI-3 (acid form) $K_D = 5$ nM<br>OSMI-4 (acid form) $K_D = 8$ nM | Very potent<br>Cell permeable<br>Specific                                   | Martin, S. E. S. et al. J. Am. Chem. Soc. 140, 13542–13545 (2018). |
| L01                                  |                | $IC_{50} = 21.8$ $\mu$ M                                                                                | Cell permeable<br>Natural product<br>Off-target effects                     | Liu, Y. et al. Sci. Rep. 7, 12334 (2017)                           |
| APNT and APBT                        |  <p>APNT</p>   | APNT: $IC_{50} = 66.7$ $\mu$ M<br>APBT $IC_{50} = 139$ $\mu$ M                                          | Cell permeable<br>Non-competitive<br>Poor aqueous solubility<br>Low potency | Wang, Y.- et al. J. Med. Chem. 60, 263–272 (2017).                 |
| LQMed 330                            |               | $IC_{50} = 11.7$ $\mu$ M                                                                                | Not selective<br>Unknown solubility and permeability                        | Albuquerque, S. O. et al. Eur. J. Pharm. Sci. 154, 105510 (2020)   |
| <b>OGT inhibitors from our group</b> |                                                                                                 |                                                                                                         |                                                                             |                                                                    |
| F20                                  |              | $IC_{50} = 116.0$ $\mu$ M                                                                               | Cell permeable<br>Low potency                                               | Zhang, H. et al. MedChemComm 9, 883–887 (2018).                    |
| 6b                                   |              | $IC_{50} = 144.5$ $\mu$ M                                                                               | Low potency                                                                 | Weiss, M. et al. Front. Chem. 9, 205 (2021).                       |

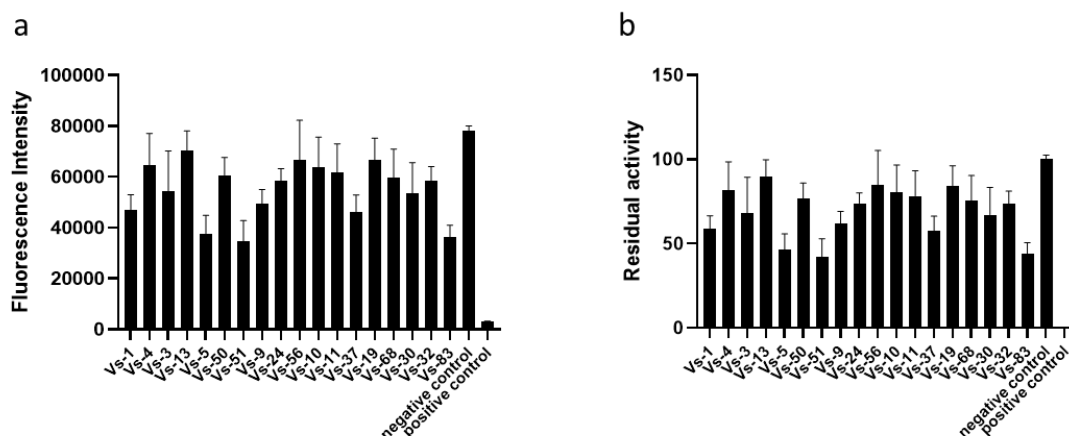

**Figure S1.** Results of the screening with OGT fluorescent activity assay. The compounds were screened at a fixed concentration of 100  $\mu$ M in two independent experiments. The results are expressed as fluorescence intensity values (a) or normalized residual activity values (b), with respect to the negative (DMSO) and positive (OSMI-4) controls.

**Table S2.** Details of the commercially available compounds screened in this study.

| Name  | Structure | Vendor         | ID         | Purity declared by vendor |
|-------|-----------|----------------|------------|---------------------------|
| Vs-1  |           | Life Chemicals | F5596-0429 | $\geq 90\%$               |
| Vs-4  |           | ChemBridge     | 87364924   | $\geq 85\%$               |
| Vs-3  |           | Enamine        | Z92480524  | $\geq 90\%$               |
| Vs-13 |           | Enamine        | Z90105807  | $\geq 90\%$               |
| Vs-24 |           | ChemBridge     | 39842207   | $\geq 85\%$               |
| Vs-30 |           | ChemBridge     | 72669148   | $\geq 85\%$               |

|              |                                                                                     |            |            |             |
|--------------|-------------------------------------------------------------------------------------|------------|------------|-------------|
| <b>Vs-5</b>  | 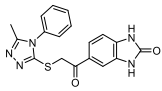   | Enamine    | Z24159125  | $\geq 90\%$ |
| <b>Vs-50</b> |    | Enamine    | Z24541217  | $\geq 90\%$ |
| <b>Vs-51</b> |    | Enamine    | Z65683626  | $\geq 90\%$ |
| <b>Vs-9</b>  |    | ChemBridge | 87867766   | $\geq 85\%$ |
| <b>Vs-56</b> |    | Enamine    | Z220335192 | $\geq 90\%$ |
| <b>Vs-32</b> |   | ChemBridge | 82571109   | $\geq 85\%$ |
| <b>Vs-10</b> |  | ChemBridge | 41869522   | $\geq 85\%$ |
| <b>Vs-11</b> |  | ChemBridge | 46452758   | $\geq 85\%$ |
| <b>Vs-37</b> |  | ChemBridge | 53010325   | $\geq 85\%$ |
| <b>Vs-19</b> |  | ChemBridge | 7555184    | $\geq 90\%$ |
| <b>Vs-68</b> |  | ChemBridge | 7915441    | $\geq 90\%$ |
| <b>Vs-83</b> |  | ChemBridge | 40085129   | $\geq 85\%$ |

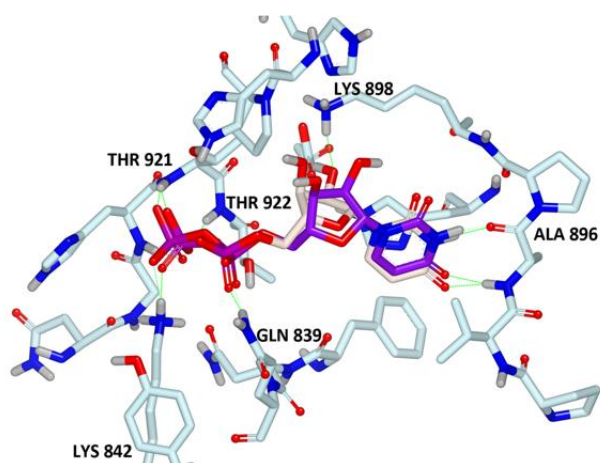

**Figure S2.** Validation of the docking experiment: overlay of the co-crystallized (beige) and re-docked (purple) ligand UDP. PDB entry: 4N39. RMSD value: 1.45.

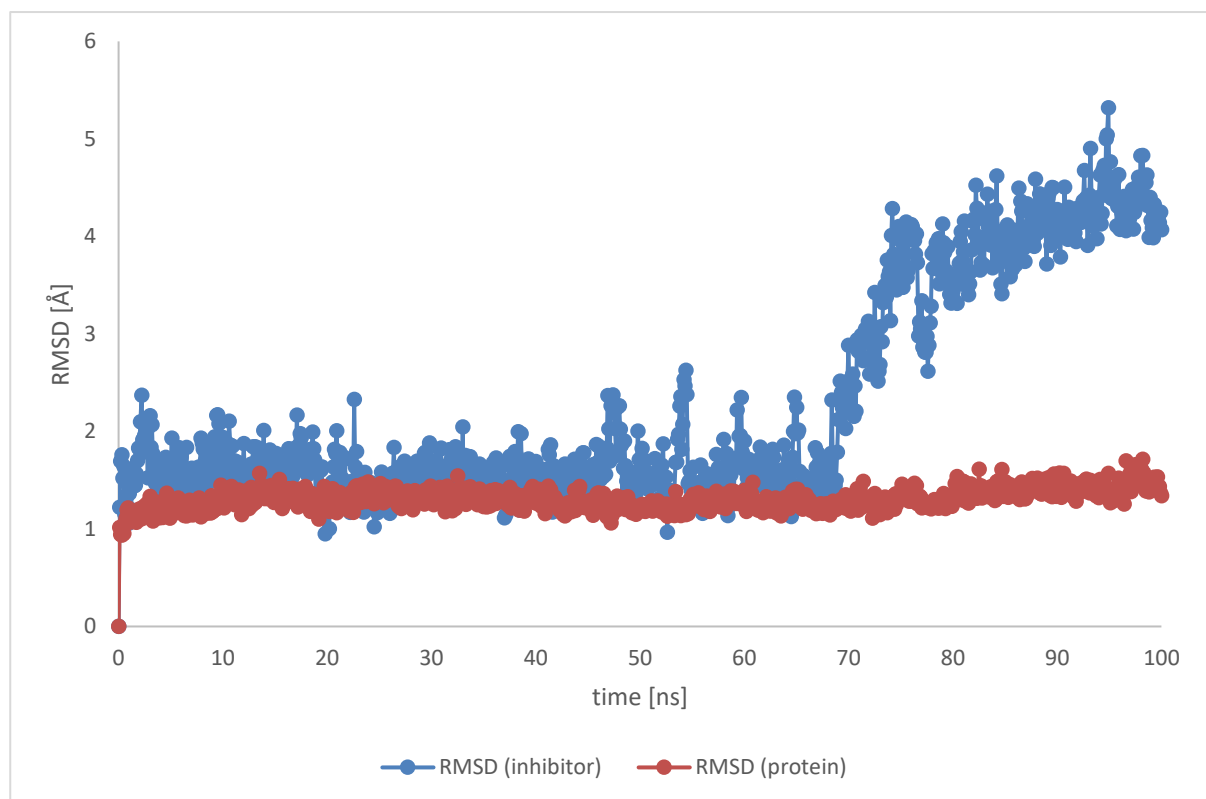

**Figure S3.** Protein (in red) and ligand (in blue) RMSD values during the 100 ns molecular dynamics simulation.

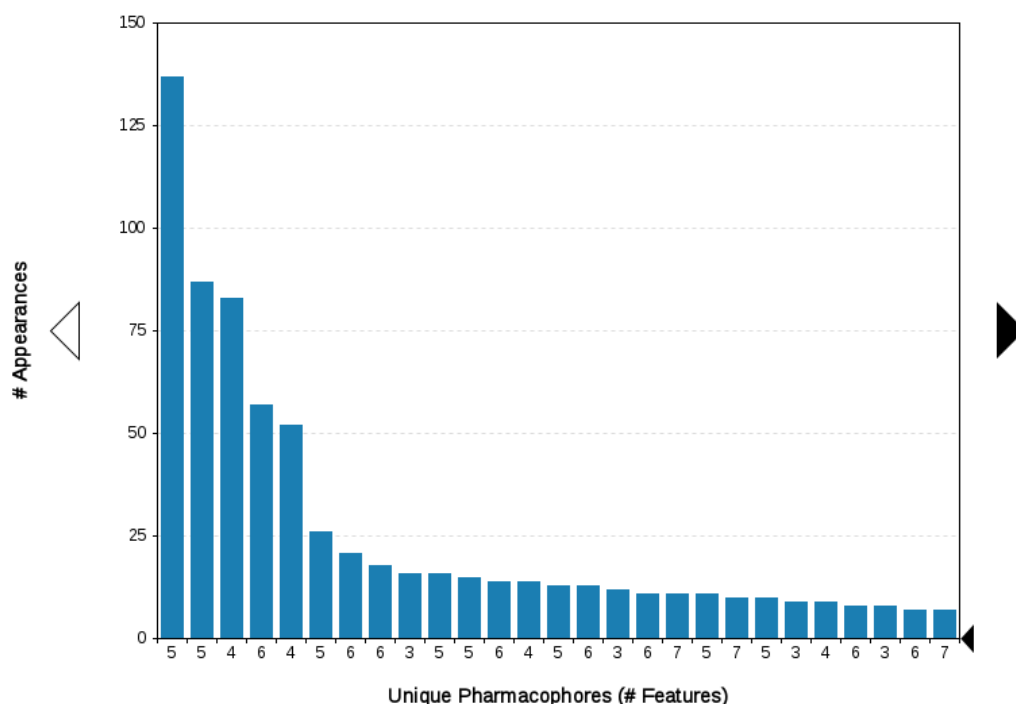

**Figure S4.** Plot of the most frequent unique structure-based pharmacophore models derived from the molecular dynamics simulations of the OGT in complex with Vs-51. The numbers below the bars indicate the numbers of interaction features observed during molecular dynamics simulation for the pharmacophore models.

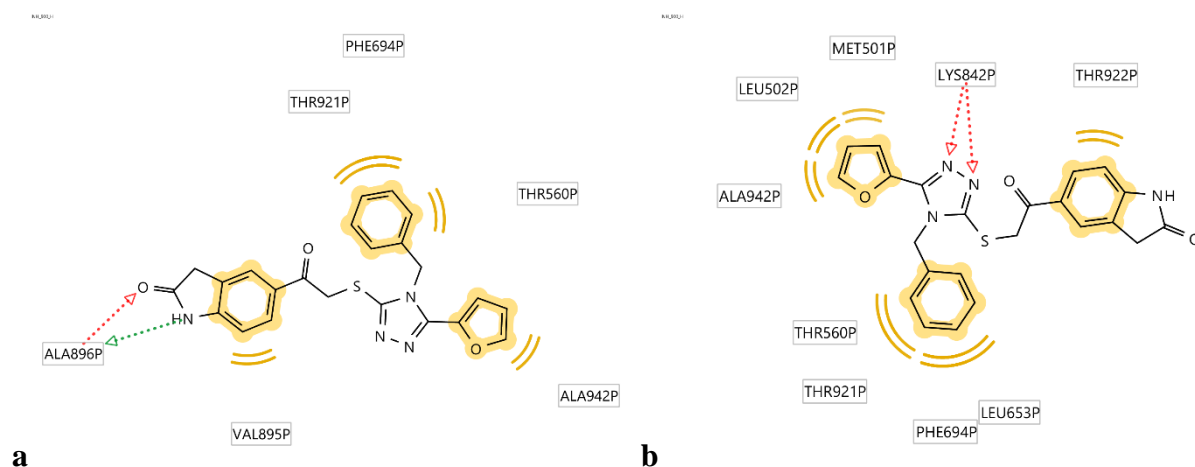

**Figure S5.** Schematic representation of the interactions between OGT and Vs-51 observed in **a)** the first and **b)** the second most frequently occurring structure-based pharmacophore model.

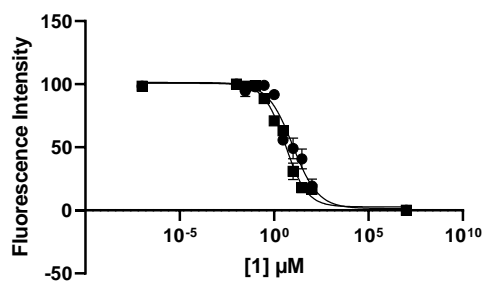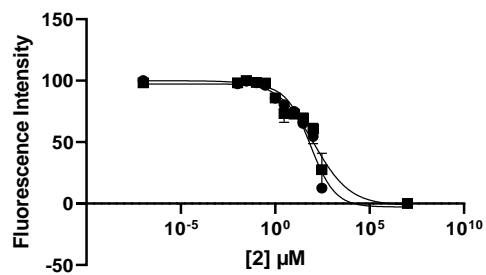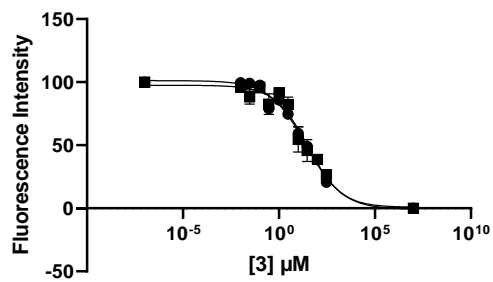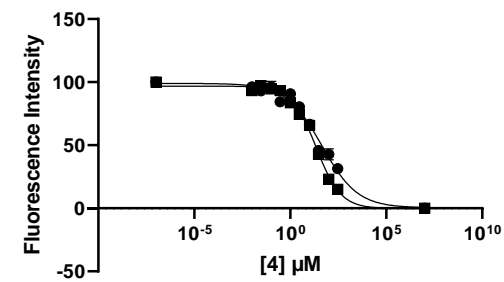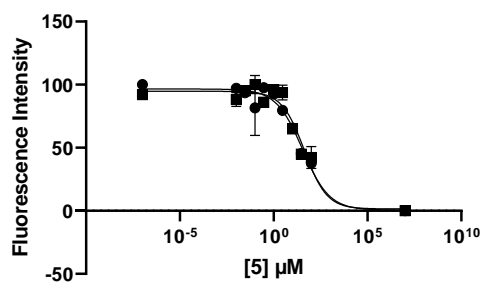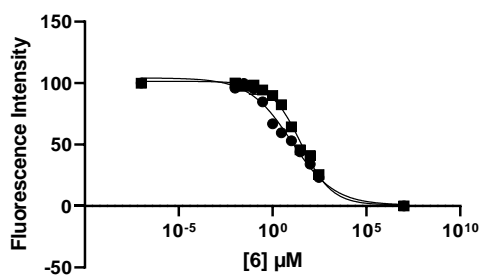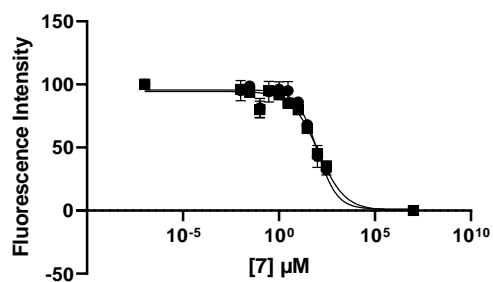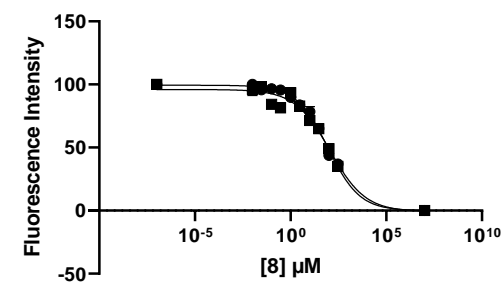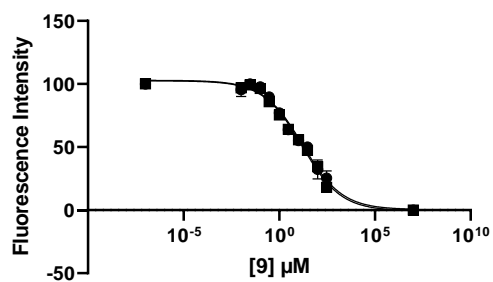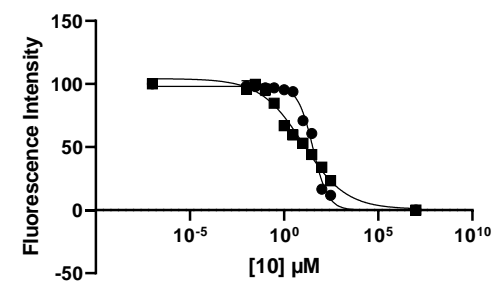

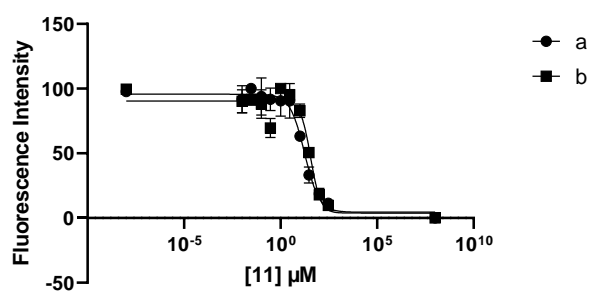

**Figure S6.** IC<sub>50</sub> curves of compounds **1-11** measured in two independent experiments. Normalized fluorescence intensity values are expressed as a percentage of the DMSO control.

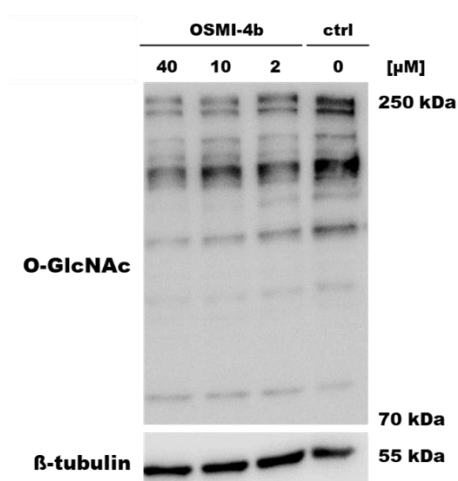

**Figure S7.** Representative picture of western blot analysis of O-GlcNAc levels after treating AMO1 cells with OSMI-4b for 4 hours (two independent experiments).



Compound **1**  $^1\text{H}$  NMR

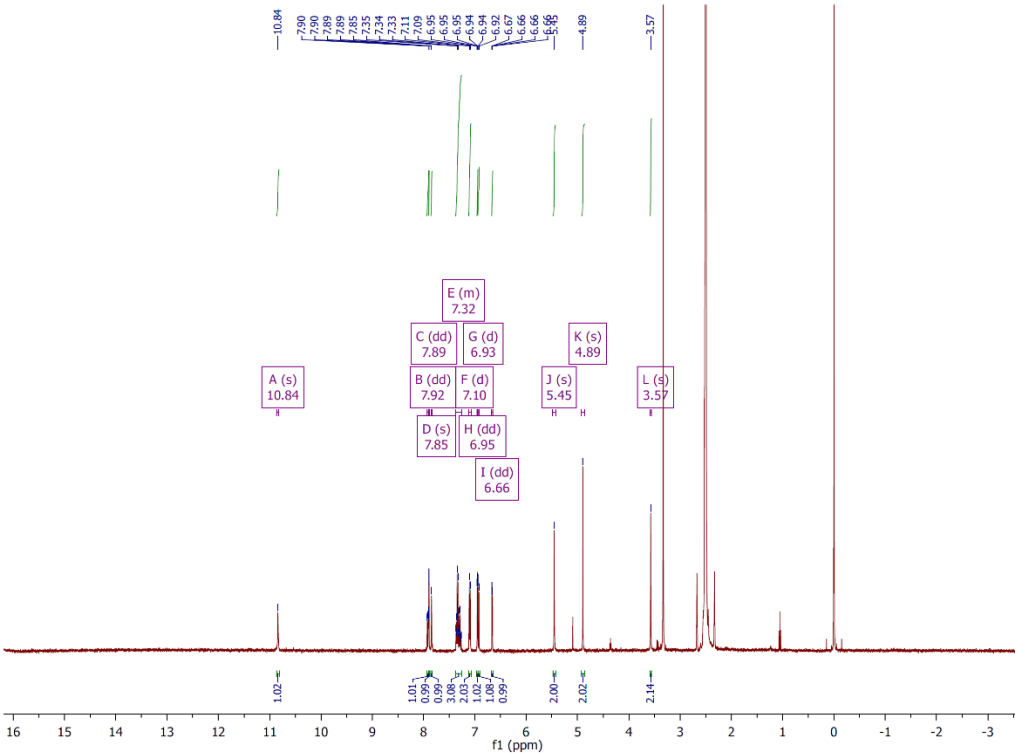

Compound **1**  $^{13}\text{C}$  NMR

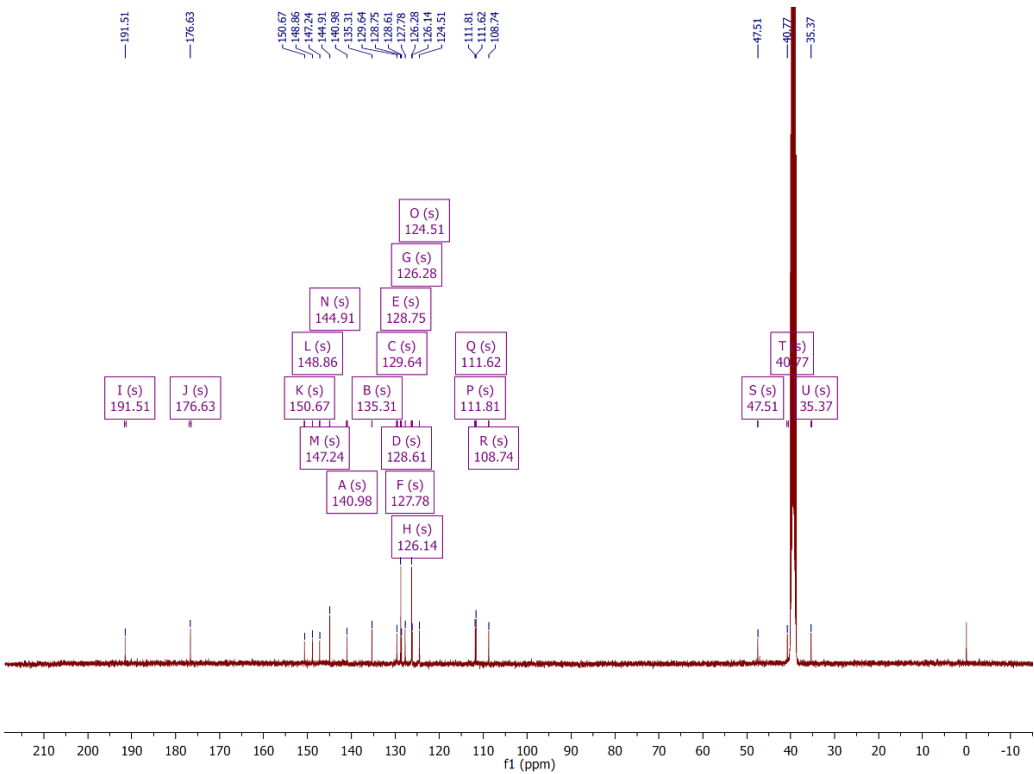

Compound **2**  $^1\text{H}$  NMR

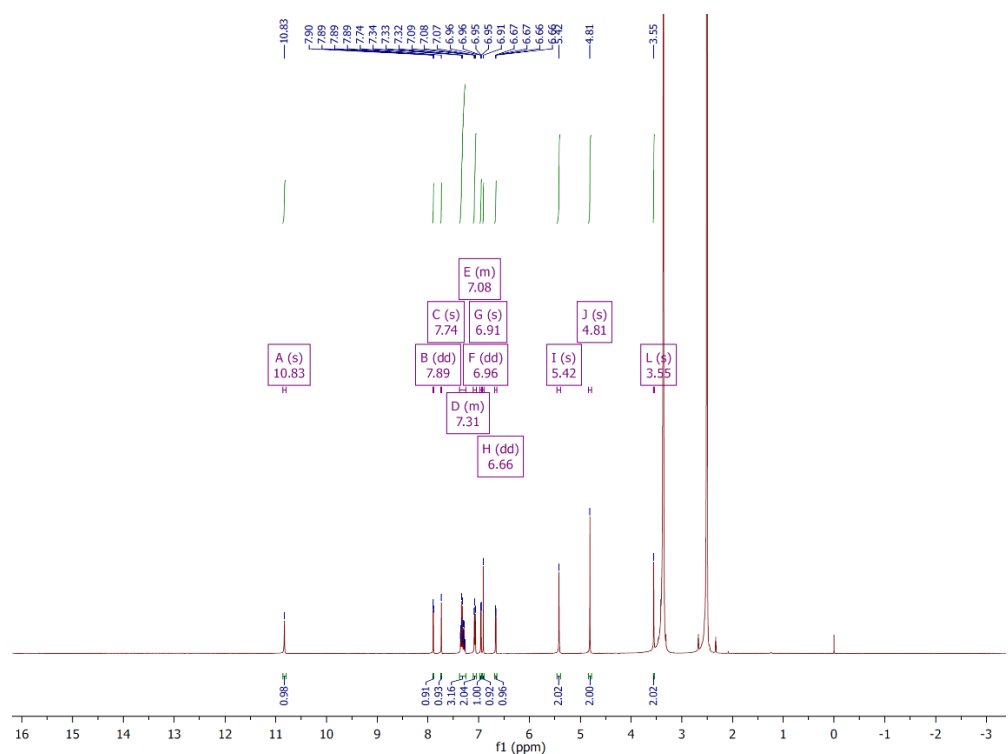

Compound **2**  $^{13}\text{C}$  NMR

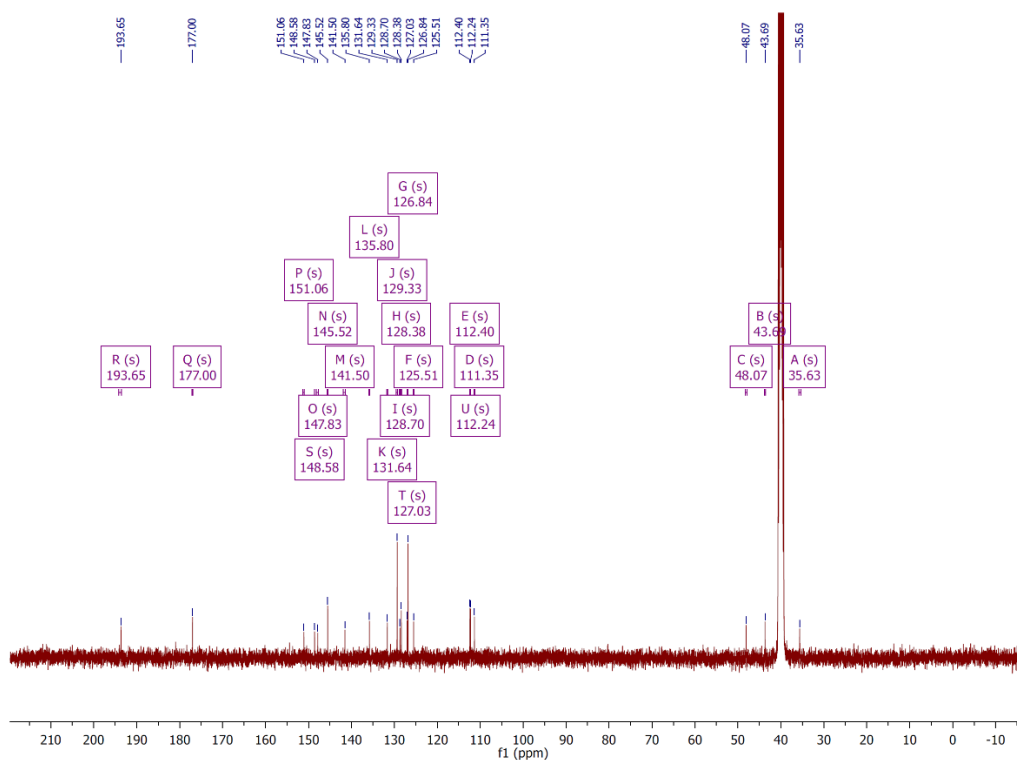

# Compound **3** $^1\text{H}$ NMR

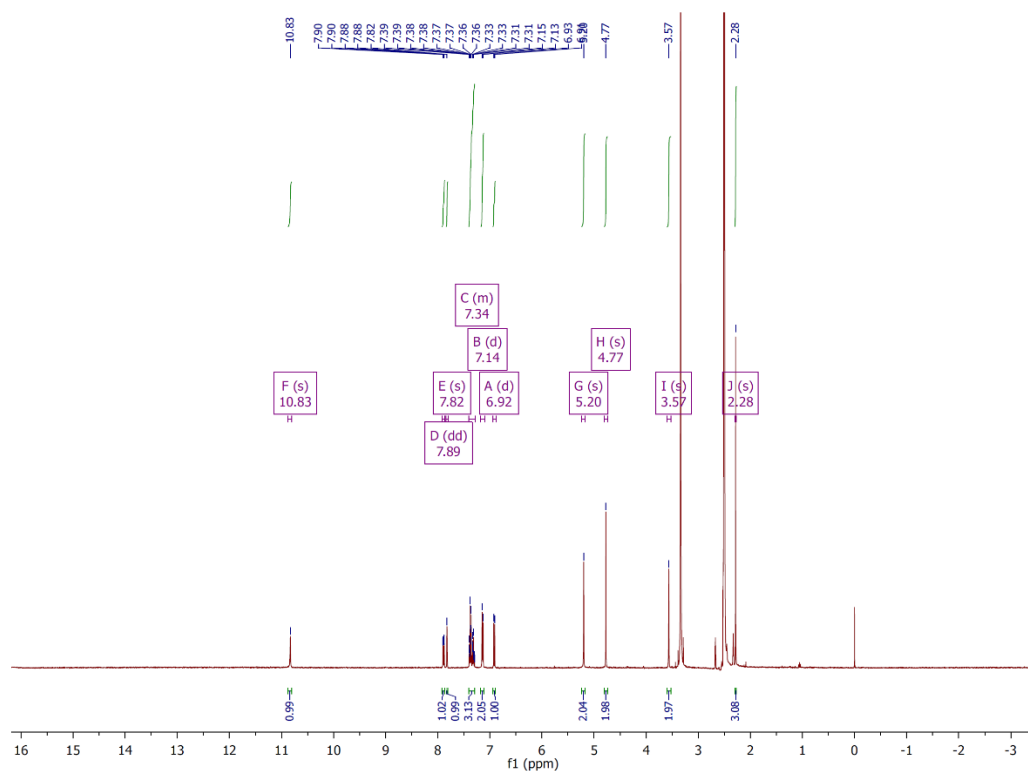

# Compound **3** $^{13}\text{C}$ NMR

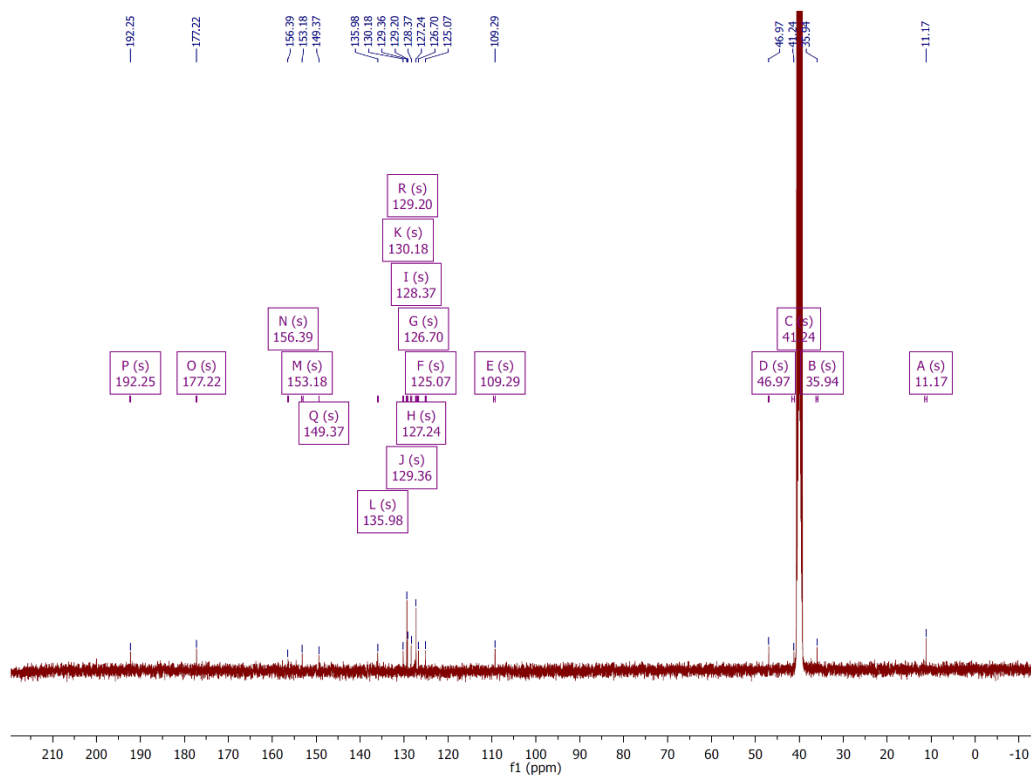

# Compound **4** $^1\text{H}$ NMR

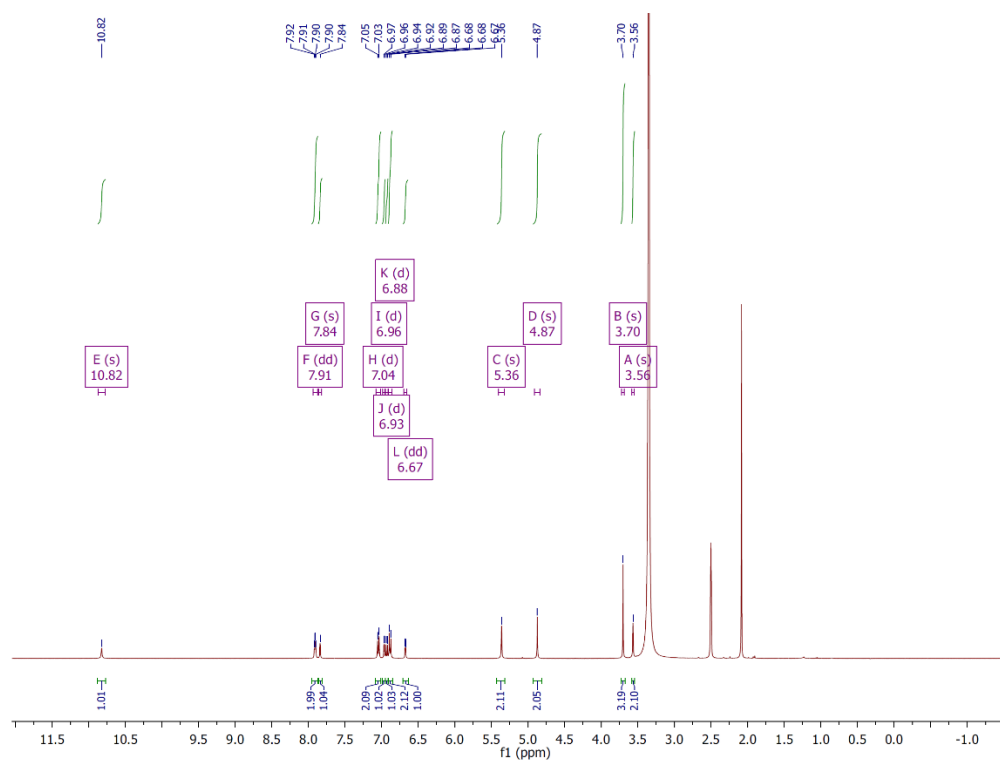

# Compound **4** $^{13}\text{C}$ NMR

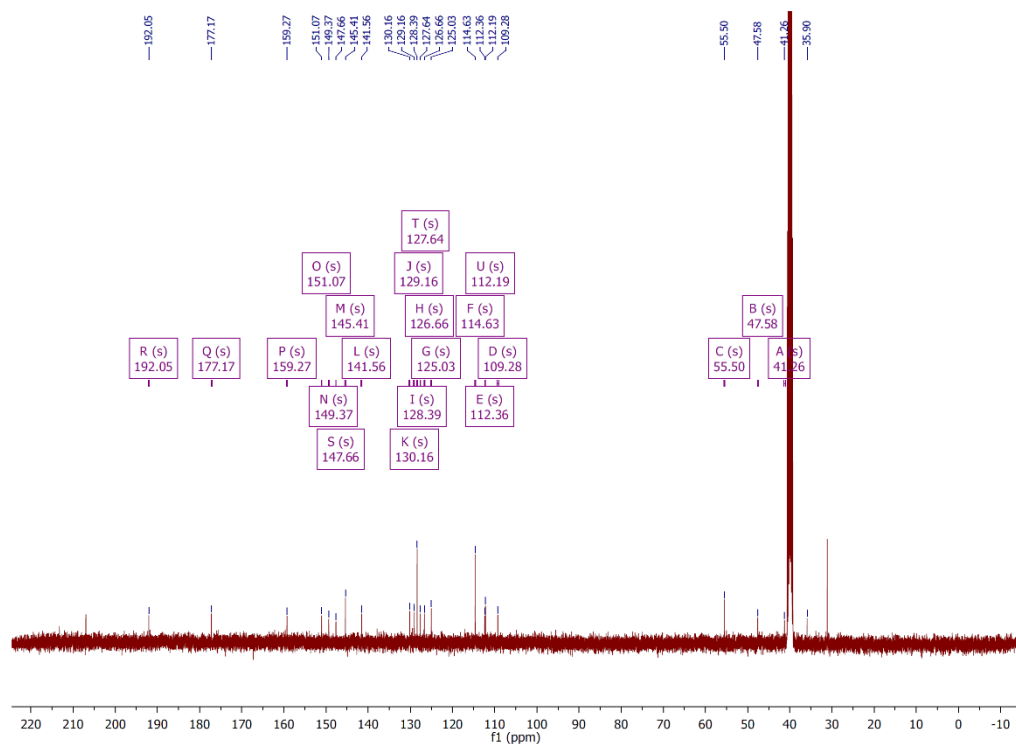

Compound **5**  $^1\text{H}$  NMR

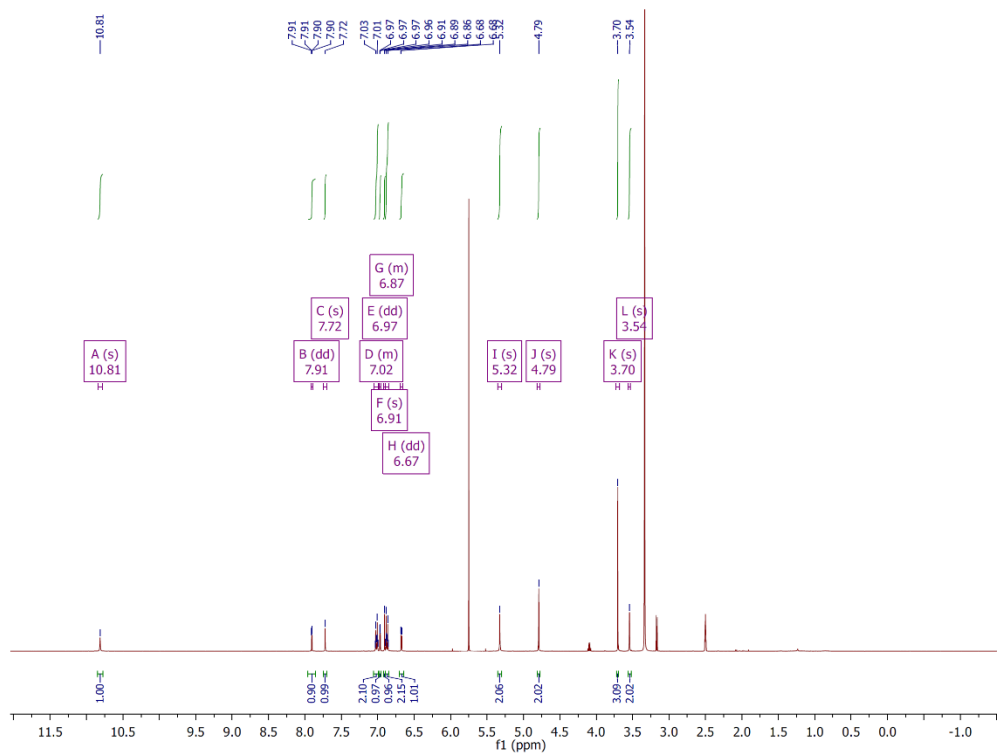

Compound **5**  $^{13}\text{C}$  NMR

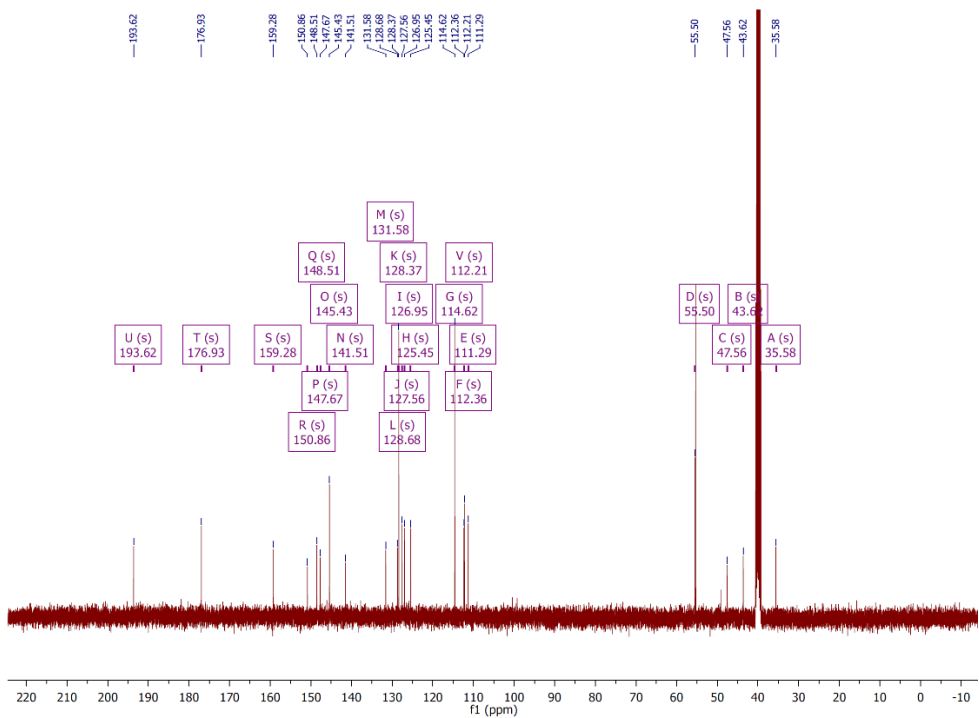

# Compound **6** $^1\text{H}$ NMR

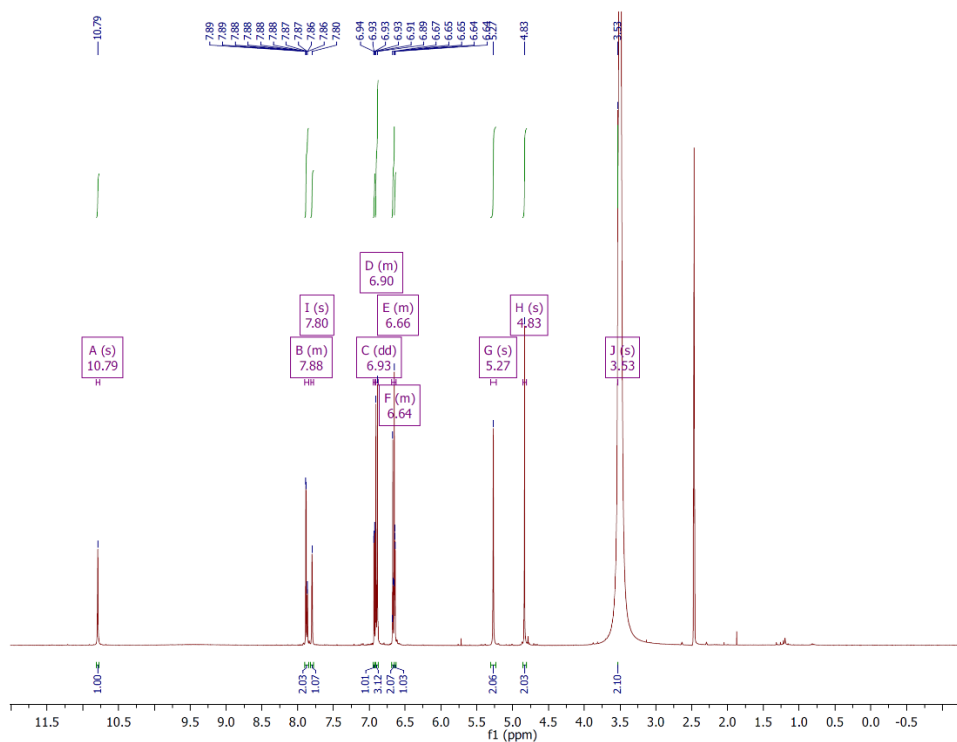

# Compound **6** $^{13}\text{C}$ NMR

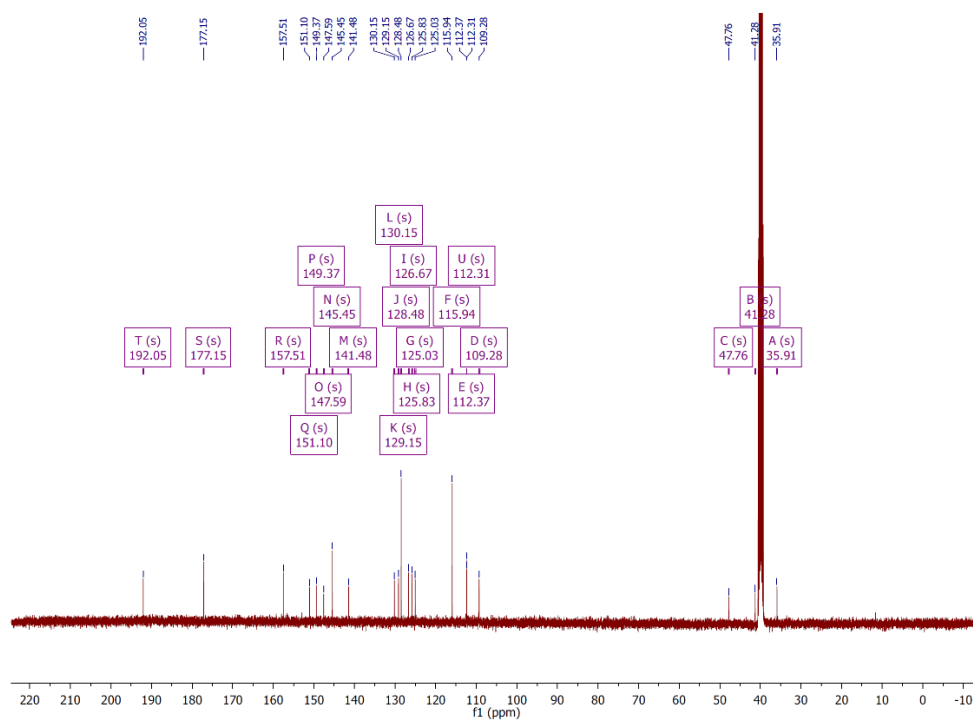

# Compound **7** $^1\text{H}$ NMR

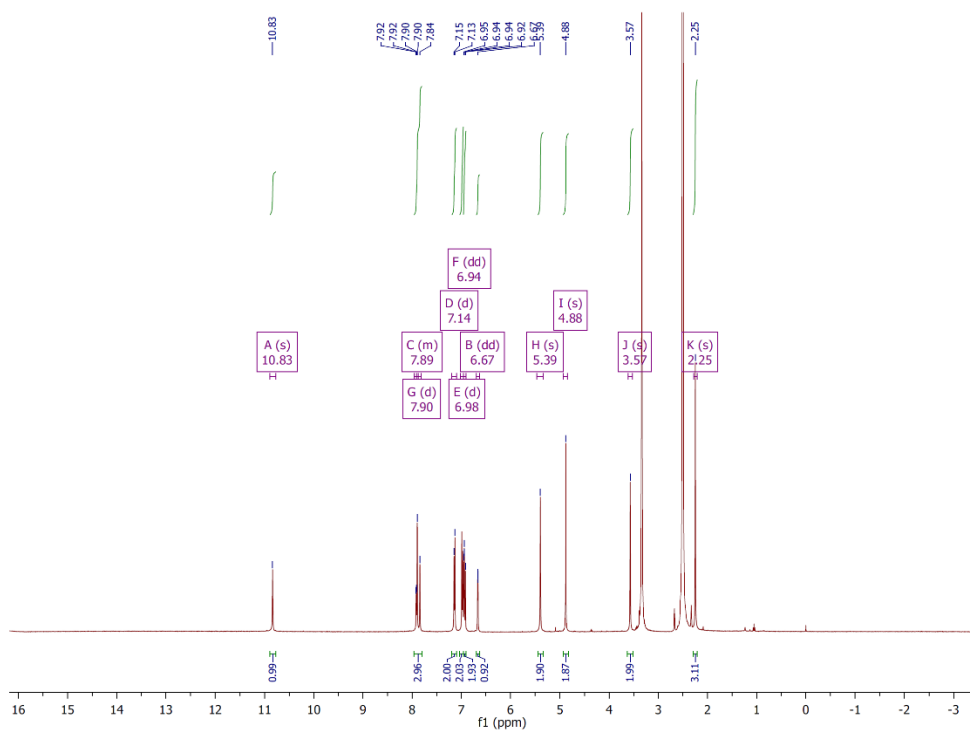

# Compound **7** $^{13}\text{C}$ NMR

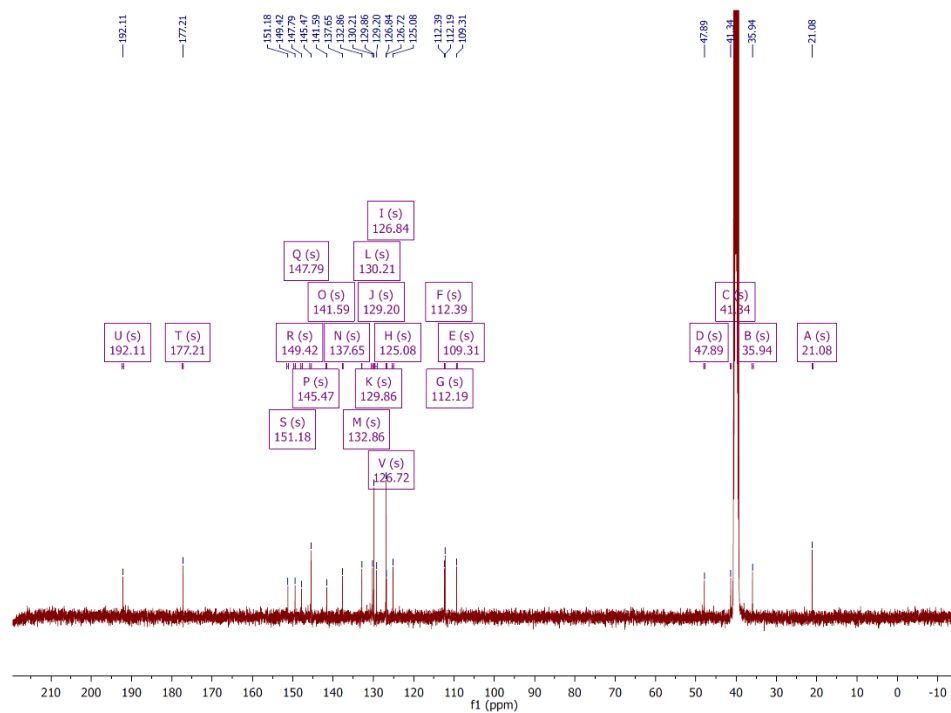

Compound **8**  $^1\text{H}$  NMR

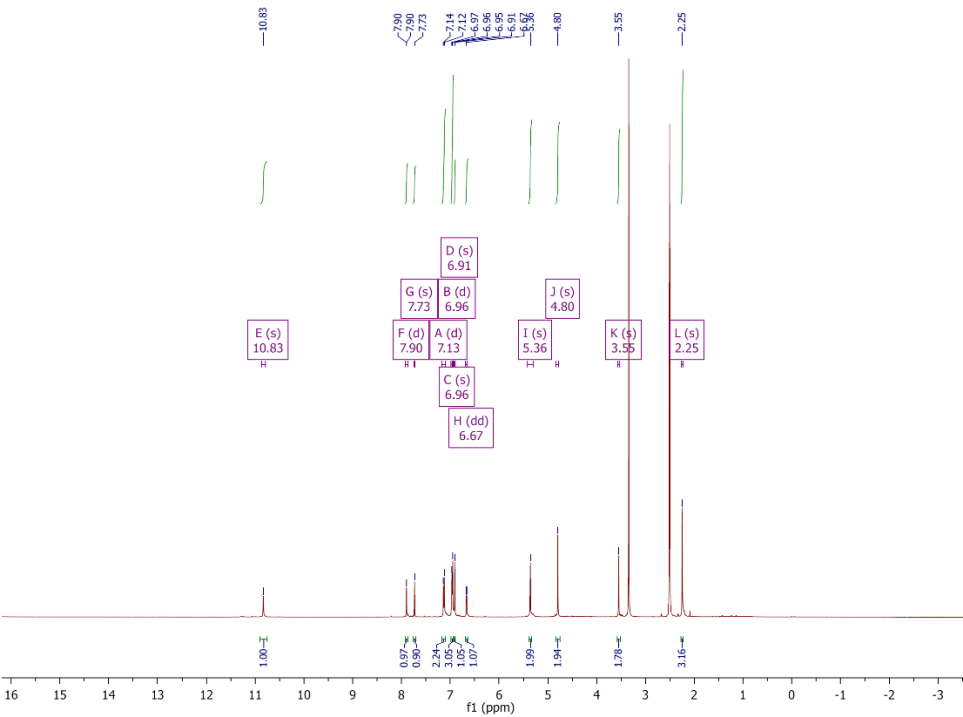

Compound **8**  $^{13}\text{C}$  NMR

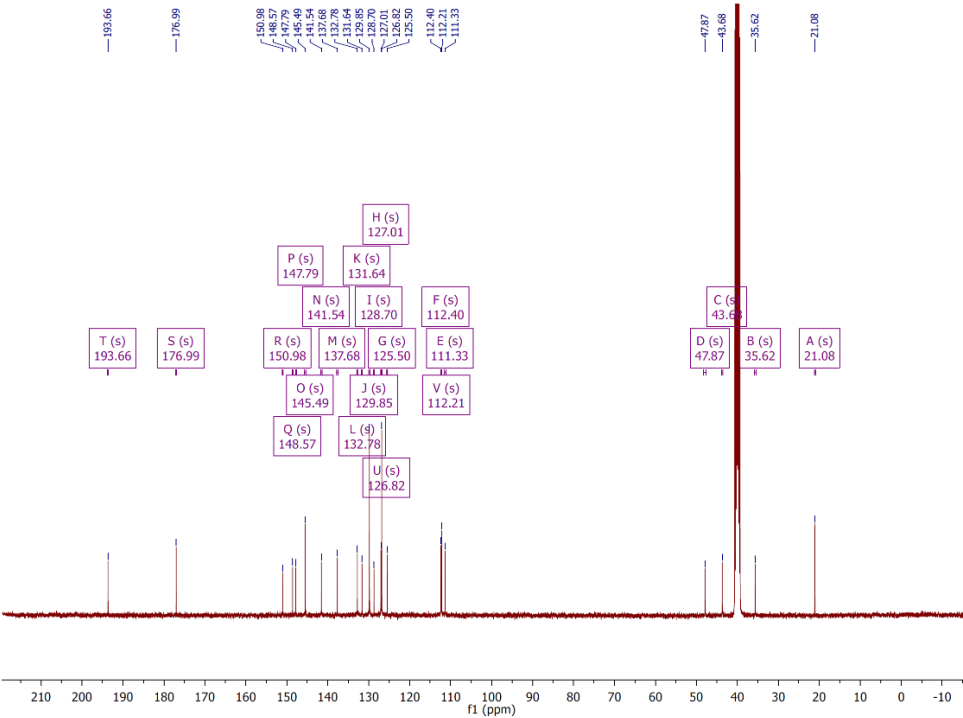



## Compound **9** $^1\text{H}$ NMR

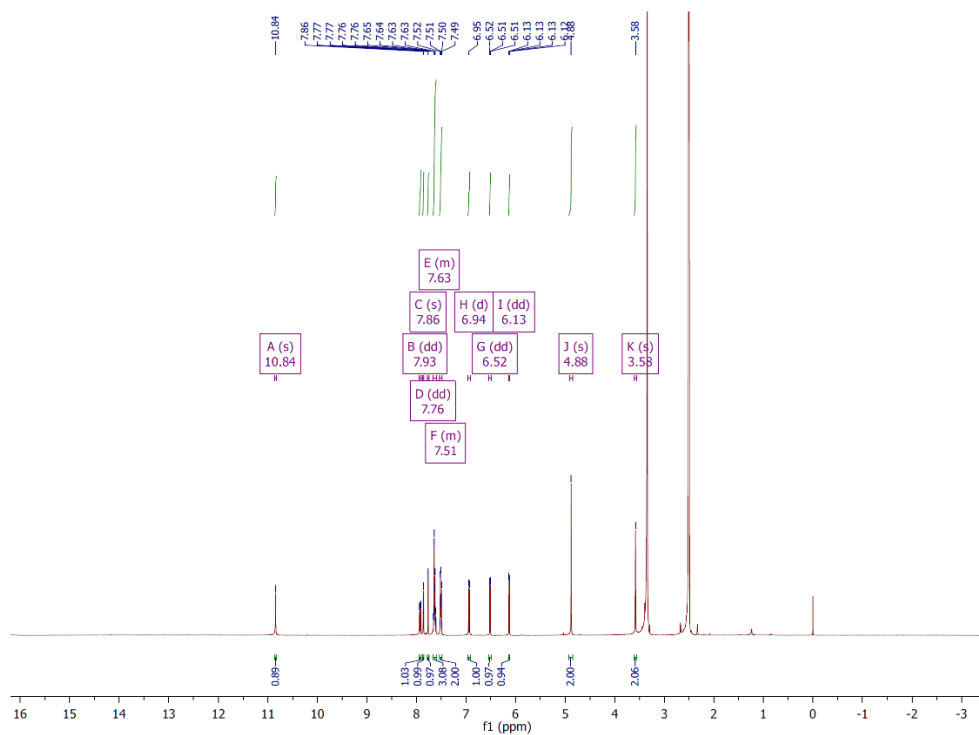

## Compound **9** $^{13}\text{C}$ NMR

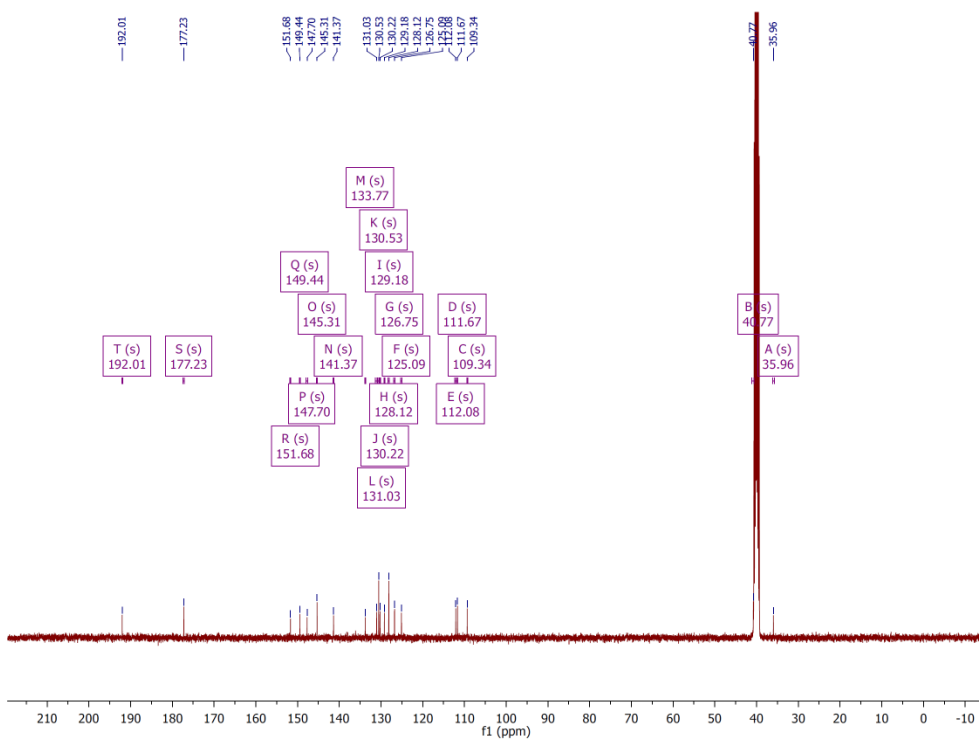

# Compound **10** $^1\text{H}$ NMR

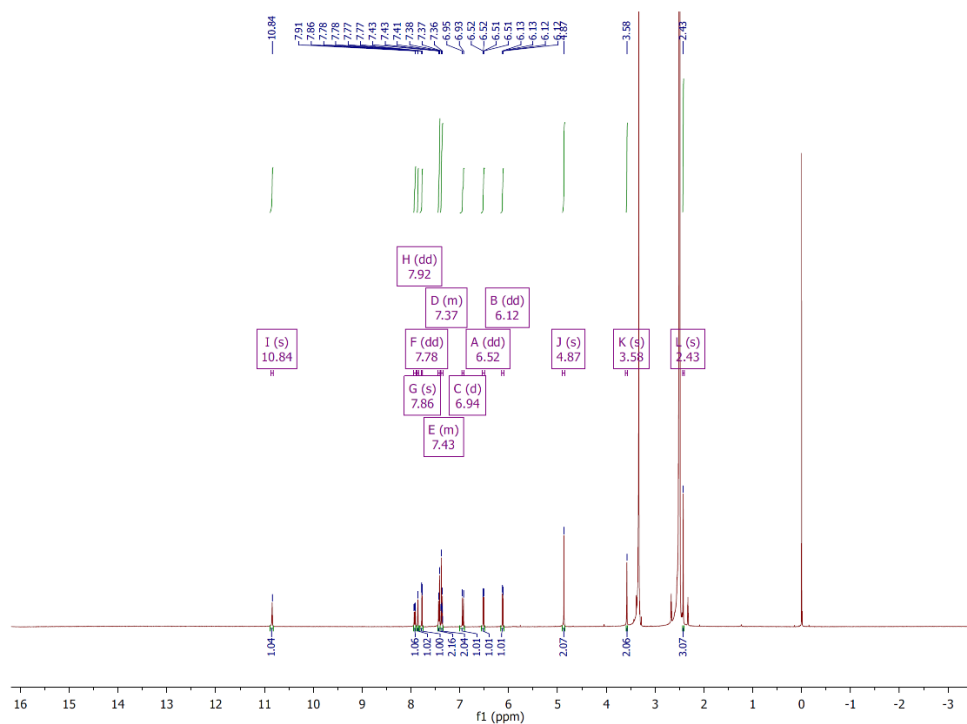

# Compound **10** $^{13}\text{C}$ NMR

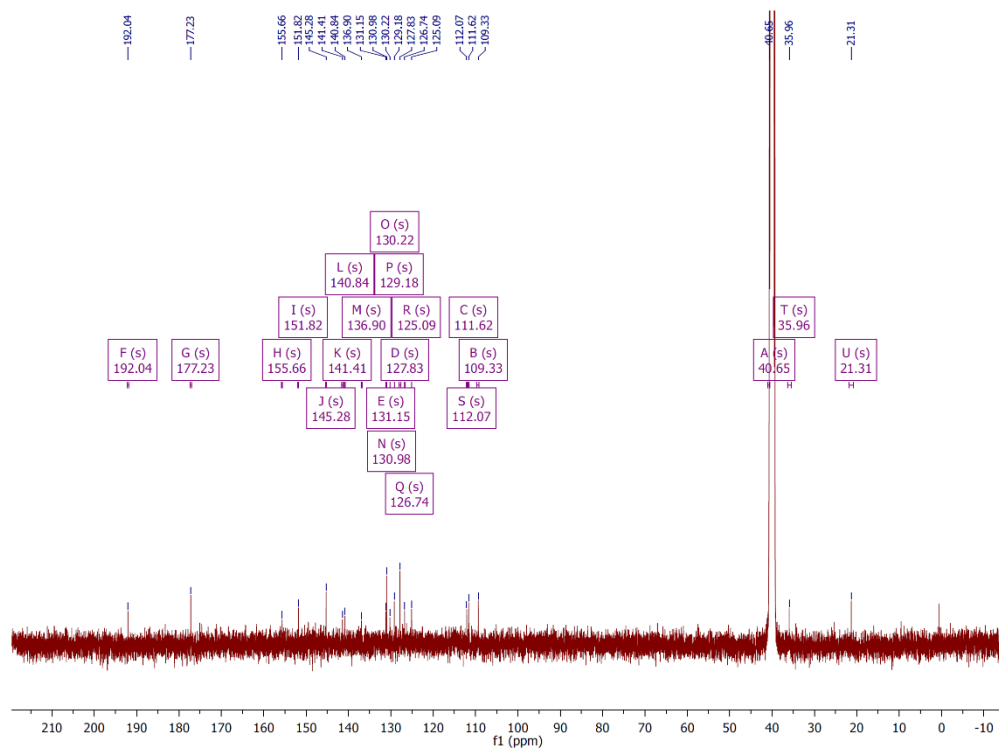

# Compound **11** $^1\text{H}$ NMR

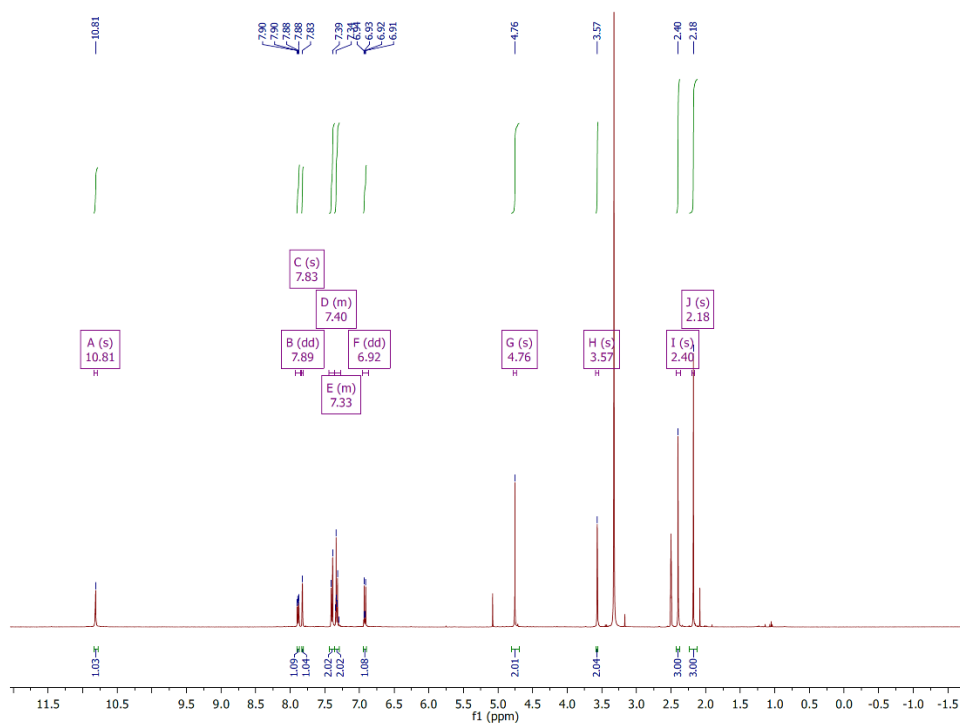

# Compound **11** $^{13}\text{C}$ NMR

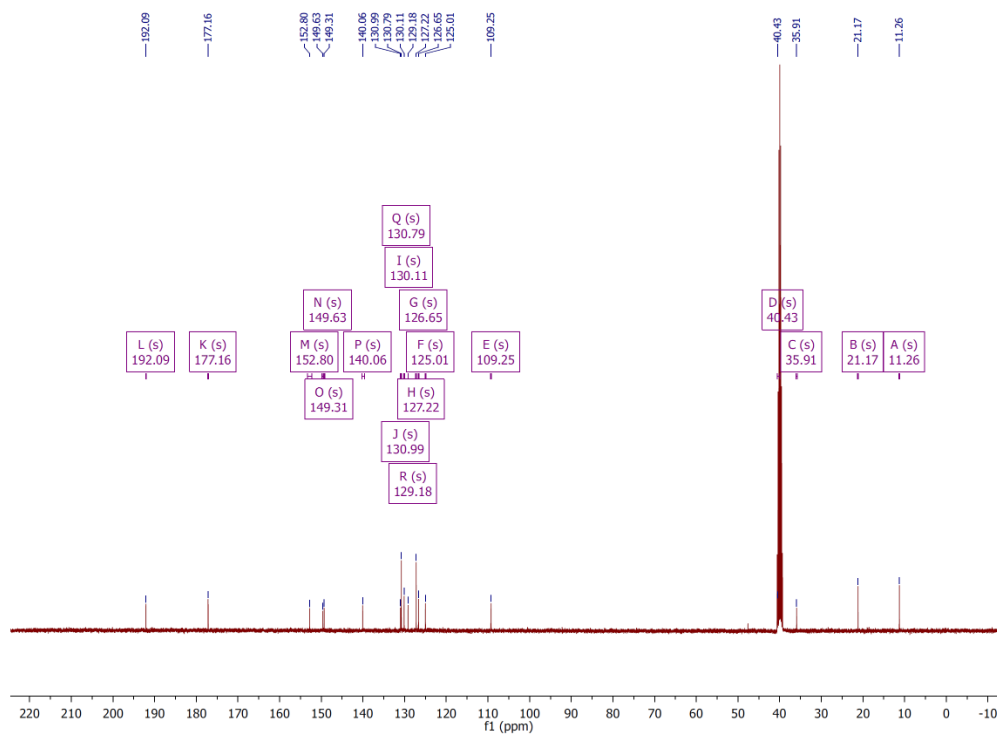

# Compound **12** $^1\text{H}$ NMR

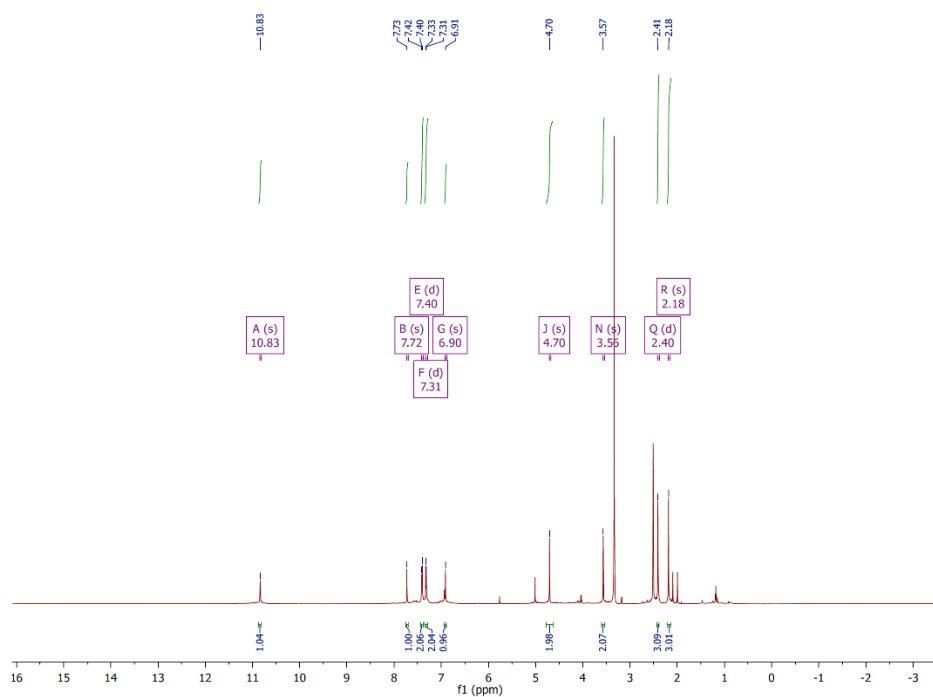

# Compound **12** $^{13}\text{C}$ NMR

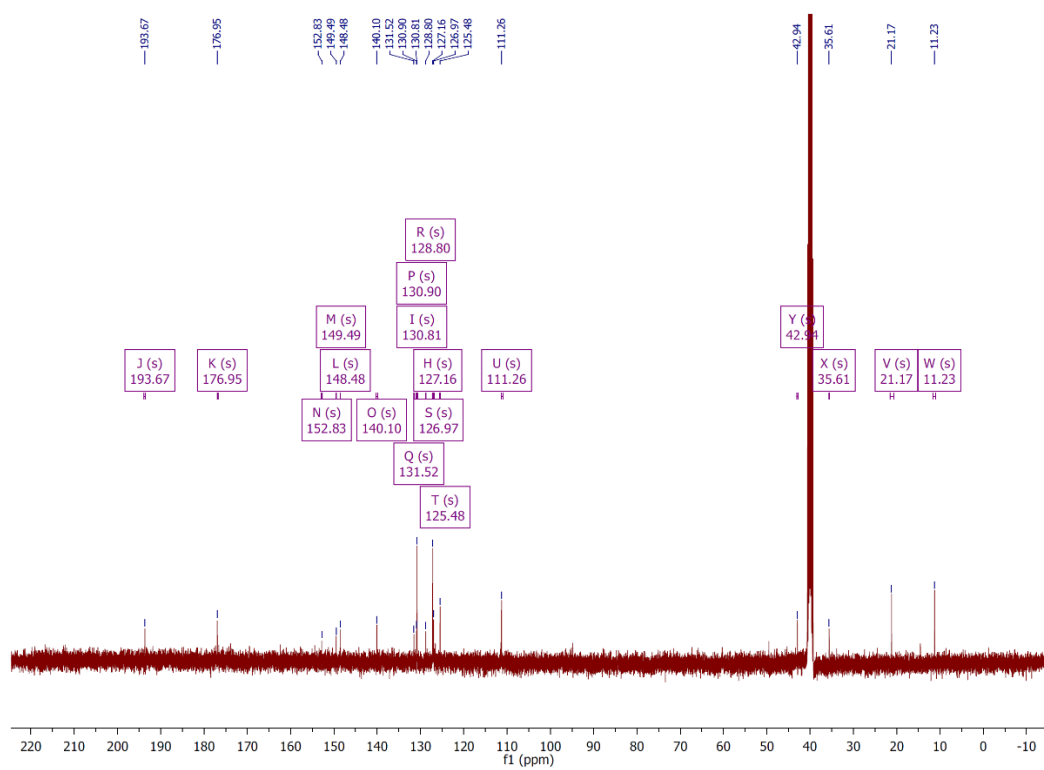

Compound **13**  $^1\text{H}$  NMR

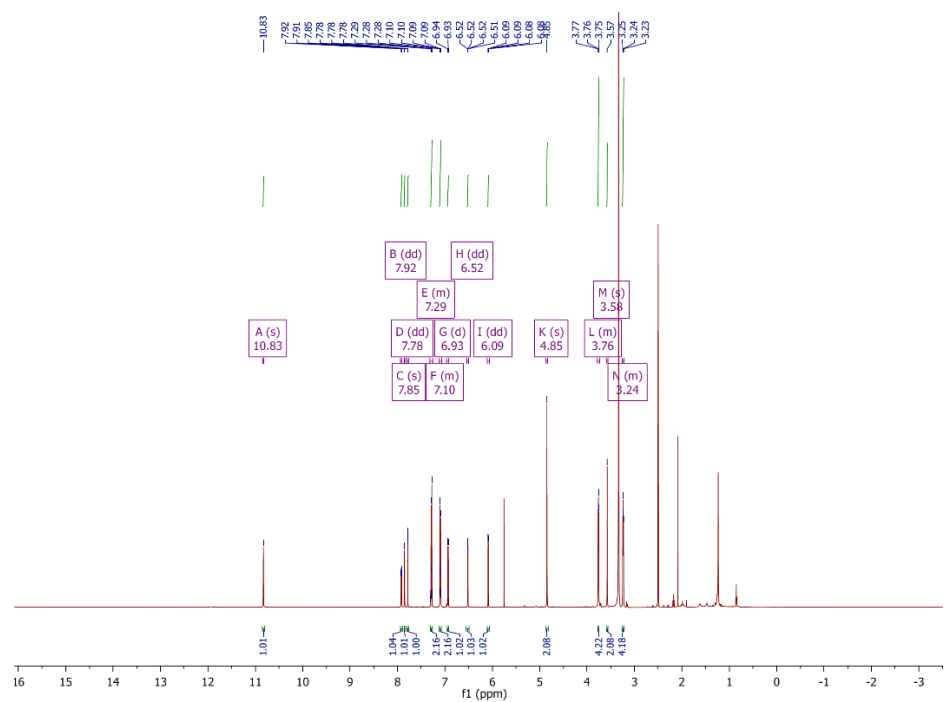

Compound **13**  $^{13}\text{C}$  NMR

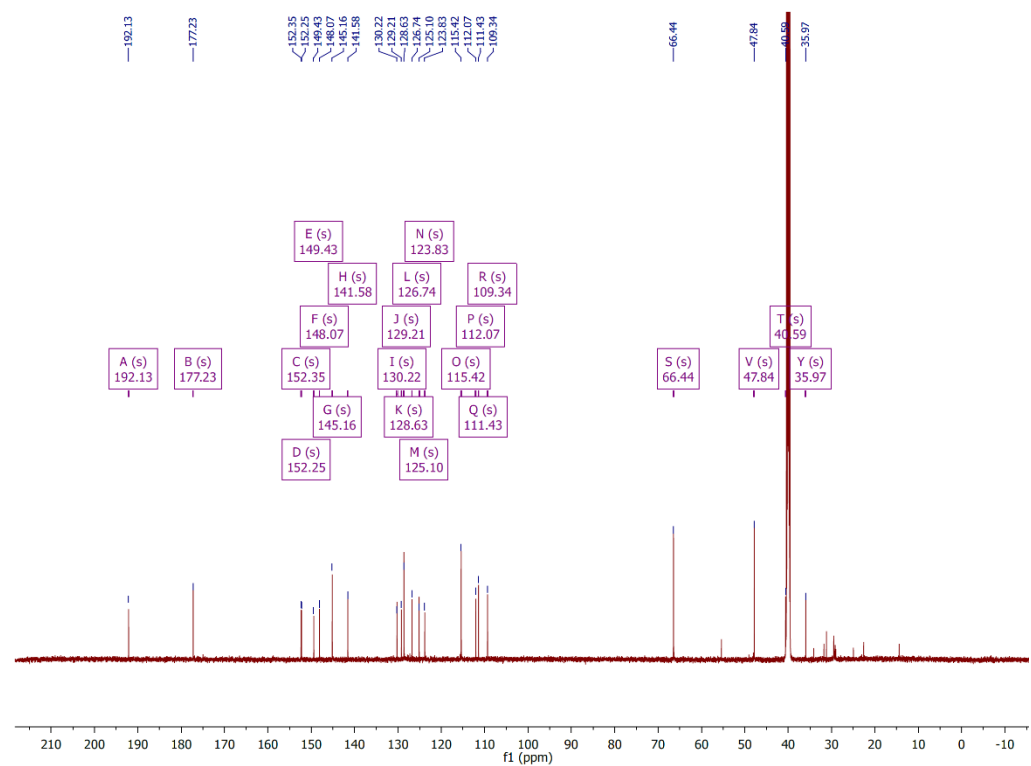

Supplement: s1 [file s1]
